# Supplementary material
Source: publisher figshare collection journal article supplement (https://acs.figshare.com/ndownloader/files/8225240)
Supplement: Supplementary file 1 [file 8225240]

## Supporting Information

# Simulating Aqueous-Phase Isoprene-Epoxydiol (IEPOX) Secondary Organic Aerosol Production During the 2013 Southern Oxidant and Aerosol Study (SOAS)

*Sri Hapsari Budisulistiorini<sup>†,∞,#</sup>, Athanasios Nenes<sup>‡,§,¶,f</sup>, Annmarie G. Carlton<sup>‡</sup>, Jason D. Surratt<sup>∞</sup>, V. Faye McNeill<sup>◇,\*</sup>, Haval O. T. Pye<sup>‡,\*</sup>*

<sup>†</sup> National Exposure Research Laboratory, US EPA, Research Triangle Park, North Carolina 27711, United States

<sup>∞</sup> Department of Environmental Sciences and Engineering, Gillings School of Global Public Health, University of North Carolina, Chapel Hill, North Carolina 27599, United States

<sup>#</sup> Earth Observatory of Singapore, Nanyang Technological University, Singapore 639798, Singapore

<sup>‡</sup> School of Earth and Atmospheric Sciences, Georgia Institute of Technology, Atlanta, Georgia 30322, United States

<sup>§</sup> School of Chemical and Biomolecular Engineering, Georgia Institute of Technology, Atlanta, Georgia 30322, United States

<sup>¶</sup> Institute of Chemical Engineering Sciences, Foundation for Research and Technology - Hellas, Patras GR-26504, Greece

<sup>f</sup> Institute of Environmental Research and Sustainable Development, National Observatory of Athens, Palea Penteli GR-15236, Greece

<sup>‡</sup> Department of Chemistry, University of California, Irvine, California, 92617, United States

<sup>◇</sup> Department of Chemical Engineering, Columbia University, New York, New York 10027, United States

\* To whom correspondence should be addressed

## Corresponding Author

\*(V.F.M) Email: vfm2103@columbia.edu

\*(H.O.T.P) Email: [Pye.Havala@epa.gov](mailto:Pye.Havala@epa.gov)

This supporting information contains 13 pages: 5 tables, 9 figures

**Table S1.** Variables used in ISORROPIA-II, CMAQ-box and simpleGAMMA models.

| Model Quantity                    | Units                            | Source of Estimate                                                |
|-----------------------------------|----------------------------------|-------------------------------------------------------------------|
| SO <sub>4</sub> <sup>2-</sup>     | μmol m <sup>-3</sup>             | ACSM                                                              |
| NO <sub>3</sub> <sup>-</sup>      | μmol m <sup>-3</sup>             | ACSM                                                              |
| Cl <sup>-</sup>                   | μmol m <sup>-3</sup>             | ACSM                                                              |
| NH <sub>4</sub> <sup>+</sup>      | μmol m <sup>-3</sup>             | ACSM                                                              |
| NH <sub>3</sub>                   | μmol m <sup>-3</sup>             | Ammonia Monitoring Network (AMoN)                                 |
| IEPOX+ISOPOOH                     | mol cm <sup>-3</sup>             | HR-ToF-CIMS                                                       |
| Aerosol surface area <sup>a</sup> | cm <sup>2</sup> cm <sup>-3</sup> | SEMS-MCPC                                                         |
| RH                                | fraction                         | NPS                                                               |
| Temperature                       | °C                               | NPS                                                               |
| LWC <sup>b</sup>                  | mol L <sup>-1</sup>              | ISORROPIA-II                                                      |
| SO <sub>4</sub> <sup>2-b</sup>    | mol L <sup>-1</sup>              | ISORROPIA-II                                                      |
| HSO <sub>4</sub> <sup>-b</sup>    | mol L <sup>-1</sup>              | ISORROPIA-II                                                      |
| NH <sub>4</sub> <sup>+b</sup>     | mol L <sup>-1</sup>              | ISORROPIA-II                                                      |
| H <sup>+b</sup>                   | mol L <sup>-1</sup>              | ISORROPIA-II                                                      |
| pH                                |                                  | Calculated from ISORROPIA-II outputs                              |
| wL <sup>c</sup>                   | cm <sup>3</sup> cm <sup>-3</sup> | Calculated from ISORROPIA-II outputs and observed organic aerosol |
| 2-methyltetrols                   | μg m <sup>-3</sup>               | GC/EI-MS                                                          |
| IEPOX-OS                          | μg m <sup>-3</sup>               | UPLC/DAD-ESI-HR-QTOFMS                                            |

<sup>a</sup>measured dry surface area was adjusted for the presence of water using aerosol water predicted by ISORROPIA-II:  $A = A_{dry} * \left[ \left( \frac{M_{inorganic}}{\rho_{inorganic}} + \frac{M_{org}}{\rho_{org}} + \frac{M_{water}}{\rho_{water}} \right) / \left( \frac{M_{inorganic}}{\rho_{inorganic}} + \frac{M_{org}}{\rho_{org}} \right) \right]^{2/3}$ , where M<sub>i</sub> is the mass of i per volume of air and ρ<sub>i</sub> is the density of the species.

<sup>b</sup>aqueous-aerosol phase concentrations (C<sub>i</sub>) obtained from ISORROPIA-II in mol L<sup>-1</sup> were adjusted for the inclusion of organic aerosol (from the ACSM) prior to use in CMAQ and simpleGAMMA box model calculations:  $C_i = C_{i,ISORROPIA} wL_{ISORROPIA} / wL$

<sup>c</sup>total liquid aerosol volume per volume of air including ISORROPIA-II predicted aqueous aerosol (sulfate, water, etc) and organic aerosol:  $wL = wL_{ISORROPIA} + M_{org} / \rho_{org}$

**Table S2.** Correlation values ( $r^2$ ) between the SOA tracers formed over 12 hours processing time and model variables. Measured SOA tracers are also correlated with the model variables.

|                                                  | Tetrol ( $\mu\text{g m}^{-3}$ ) |                 |                  |                 |                  |                 | IEPOXOS ( $\mu\text{g m}^{-3}$ ) |                 |                  |                 |                  |                 |
|--------------------------------------------------|---------------------------------|-----------------|------------------|-----------------|------------------|-----------------|----------------------------------|-----------------|------------------|-----------------|------------------|-----------------|
|                                                  | CMAQ                            |                 | simpleGAMMA      |                 | Measured         |                 | CMAQ                             |                 | simpleGAMMA      |                 | Measured         |                 |
|                                                  | <i>w/o corr.</i>                | <i>w/ corr.</i> | <i>w/o corr.</i> | <i>w/ corr.</i> | <i>w/o corr.</i> | <i>w/ corr.</i> | <i>w/o corr.</i>                 | <i>w/ corr.</i> | <i>w/o corr.</i> | <i>w/ corr.</i> | <i>w/o corr.</i> | <i>w/ corr.</i> |
| $k_{\text{particle}}$<br>( $\text{s}^{-1}$ )     | 0.26                            | 0.68            | 0.16             | 0.69            | 0.07             | 0.39            | 0.36                             | 0.68            | 0.30             | 0.71            | 0.23             | 0.46            |
| IEPOX <sub>(g)</sub><br>( $\text{mol cm}^{-3}$ ) | 0.53                            | 0.30            | 0.40             | 0.31            | 0.15             | 0.15            | 0.55                             | 0.30            | 0.47             | 0.37            | 0.35             | 0.35            |
| SA<br>( $\text{cm}^2 \text{cm}^{-3}$ )           | 0.63                            | 0.55            | 0.69             | 0.72            | 0.46             | 0.59            | 0.50                             | 0.55            | 0.61             | 0.61            | 0.48             | 0.48            |
| LWC<br>( $\text{mol L}^{-1}$ )                   | 0.06                            | 0.11            | 0.01             | 0.19            | 0.01             | 0.16            | 0.12                             | 0.11            | 0.07             | 0.12            | 0.08             | 0.05            |
| $a_{H^+}$<br>( $\text{mol L}^{-1}$ )             | 0.30                            | 0.50            | 0.20             | 0.53            | 0.09             | 0.32            | 0.40                             | 0.55            | 0.34             | 0.64            | 0.26             | 0.50            |
| RH                                               | 0.05                            | 0.00            | 0.01             | 0.00            | 0.00             | 0.00            | 0.12                             | 0.01            | 0.06             | 0.02            | 0.07             | 0.07            |
| Volume<br>( $\text{cm}^3 \text{cm}^{-3}$ )       | 0.17                            | 0.13            | 0.41             | 0.23            | 0.33             | 0.18            | 0.08                             | 0.10            | 0.24             | 0.12            | 0.14             | 0.06            |

*w/ corr.* and *w/o corr.* respectively refer to variables with and without liquid water added to the measured dry-size distribution to get the atmospherically relevant size distribution particles and organics added to the predicted particle volume by ISORROPIA.

**Table S3.** CMAQ predicted IEPOX and ISOPOOH for the Look Rock, TN site averaged by hour of day for July 2013. CMAQ simulations for this time period are the same as those in Pye et al. (2015).

| Hour      | Predicted<br>ISOPOOH | Predicted<br>IEPOX | Predicted<br>IEPOX/ISOPOOH | Predicted<br>ISOPOOH/IEPOX ( <i>b</i> ) |
|-----------|----------------------|--------------------|----------------------------|-----------------------------------------|
| EST=GMT-5 | ppt                  | ppt                | ratio                      | ratio                                   |
| 0         | 42                   | 152                | 3.24                       | 0.28                                    |
| 1         | 39                   | 142                | 3.41                       | 0.28                                    |
| 2         | 40                   | 139                | 3.77                       | 0.29                                    |
| 3         | 43                   | 142                | 4.24                       | 0.30                                    |
| 4         | 42                   | 146                | 4.52                       | 0.29                                    |
| 5         | 35                   | 133                | 4.08                       | 0.26                                    |
| 6         | 29                   | 105                | 3.11                       | 0.27                                    |
| 7         | 40                   | 116                | 2.44                       | 0.34                                    |
| 8         | 70                   | 162                | 2.25                       | 0.43                                    |
| 9         | 103                  | 187                | 1.65                       | 0.55                                    |
| 10        | 131                  | 198                | 1.36                       | 0.66                                    |
| 11        | 154                  | 216                | 1.33                       | 0.71                                    |
| 12        | 173                  | 248                | 1.40                       | 0.70                                    |
| 13        | 187                  | 282                | 1.53                       | 0.66                                    |
| 14        | 199                  | 324                | 1.67                       | 0.61                                    |
| 15        | 187                  | 345                | 1.83                       | 0.54                                    |
| 16        | 183                  | 336                | 1.84                       | 0.54                                    |
| 17        | 164                  | 278                | 1.78                       | 0.59                                    |
| 18        | 134                  | 207                | 1.70                       | 0.65                                    |
| 19        | 109                  | 167                | 1.66                       | 0.65                                    |
| 20        | 86                   | 153                | 1.91                       | 0.56                                    |

| Hour | Predicted<br>ISOPOOH | Predicted<br>IEPOX | Predicted<br>IEPOX/ISOPOOH | Predicted<br>ISOPOOH/IEPOX ( <i>b</i> ) |
|------|----------------------|--------------------|----------------------------|-----------------------------------------|
| 21   | 65                   | 143                | 2.25                       | 0.46                                    |
| 22   | 55                   | 151                | 2.59                       | 0.36                                    |
| 23   | 48                   | 163                | 3.01                       | 0.29                                    |

**Table S4.** Correlations of estimated and measured IEPOXOS and tetrols.

| Estimated<br>tracer | simpleGAMMA |             |             |       | CMAQ-box    |             |
|---------------------|-------------|-------------|-------------|-------|-------------|-------------|
|                     | $r^2$       | Slope       |             | $r^2$ | Slope       |             |
|                     |             | t = 12 h    | t = 6 h     |       | t = 12 h    | t = 6 h     |
| IEPOXOS             | 0.60        | 1.04 ± 0.09 | 0.52 ± 0.04 | 0.57  | 0.74 ± 0.08 | 0.37 ± 0.04 |
| Tetrols             | 0.53        | 3.25 ± 0.30 | 1.51 ± 0.14 | 0.50  | 2.27 ± 0.25 | 1.14 ± 0.12 |

**Table S5.** Multivariate regression analysis of relationships between  $k_{\text{particle}}$  and SA to SOA tracers prediction (IEPOXOS and tetrols) as well as between  $a_{H^+}$  and  $\text{SO}_4^{2-}$  to  $k_{\text{particle}}$ .

|                       | $r^2$ | p-value                 |
|-----------------------|-------|-------------------------|
| Equation S1: IEPOXOS  | 0.70  |                         |
| Intercept             |       | 6.27 x 10 <sup>-6</sup> |
| $k_{\text{particle}}$ |       | 8.51 x 10 <sup>-7</sup> |
| SA                    |       | 4.66 x 10 <sup>-2</sup> |
| Equation S2: Tetrol   | 0.73  |                         |
| Intercept             |       | 1.25 x 10 <sup>-7</sup> |

|                                    | <b>r<sup>2</sup></b> | <b>p-value</b>         |
|------------------------------------|----------------------|------------------------|
| $k_{\text{particle}}$              |                      | $1.99 \times 10^{-5}$  |
| SA                                 |                      | $5.19 \times 10^{-4}$  |
| Equation S3: $k_{\text{particle}}$ | 0.89                 |                        |
| Intercept                          |                      | $2.11 \times 10^{-4}$  |
| $a_{H^+}$                          |                      | $6.25 \times 10^{-19}$ |
| SO <sub>4</sub>                    |                      | $2.82 \times 10^{-5}$  |

Multivariate regression models are:

$$IEPOXOS = a + b \cdot k_{\text{particle}} + c \cdot SA \quad (\text{S1})$$

$$tetrol = a + b \cdot k_{\text{particle}} + c \cdot SA \quad (\text{S2})$$

$$k_{\text{particle}} = a + b \cdot a_{H^+} + c \cdot SO_4 \quad (\text{S3})$$

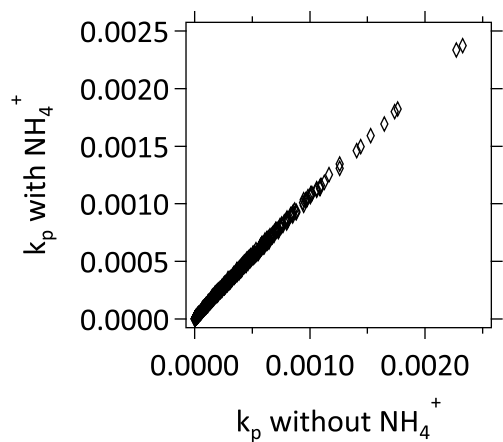

**Figure S1.** Effect of adding  $\text{NH}_4^+$  protonation reaction with IEPOX in  $k_{\text{particle}}$  ( $\text{s}^{-1}$ ) is negligible as showed by slope of 1.05 for both CMAQ and simpleGAMMA.

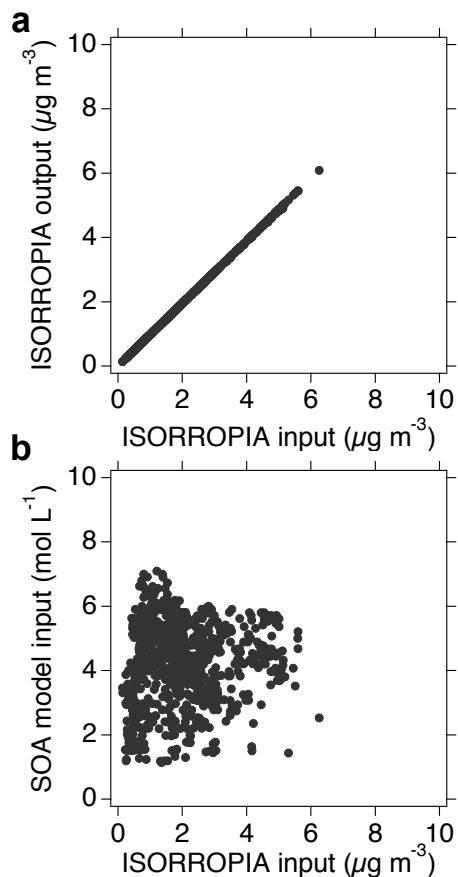

**Figure S2.** Scatterplots of  $[\text{SO}_4^{2-}]$  measured by the ACSM at LRK site (x-axis) versus (a) output of the ISORROPIA-II, and (b) input used in the SOA model (CMAQ and simpleGAMMA). Nucleophile concentration, for instance  $\text{SO}_4^{2-}$ , used as input in the SOA model considers



contribution of other inorganic ions and organics, as described in the footnote of Table S1. Thus, the values are different from  $\text{SO}_4^{2-}$  measured by ACSM.

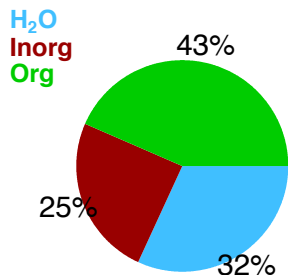

**Figure S3.** Fraction of inorganic (red), organic (green) and liquid water (blue) in the aerosol.

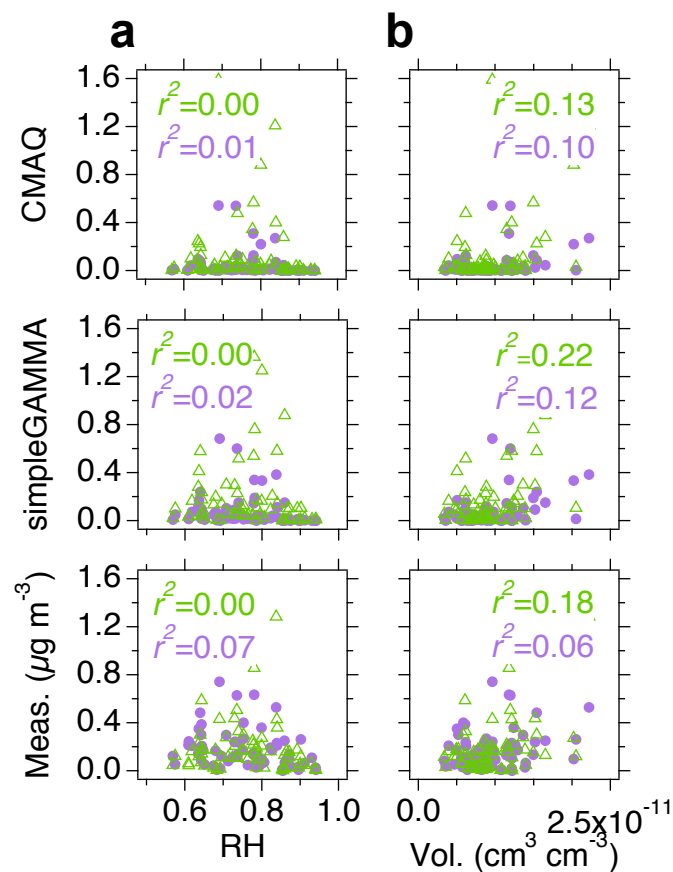

**Figure S4.** Correlation between estimated IEPOXOS (solid purple circle) and tetrols (open green triangle) by CMAQ and simpleGAMMA in  $\mu\text{g m}^{-3}$  as well as measured tracers during 2013 SOAS at LRK with model variables: (a) relative humidity (RH) and (b) aerosol volume (Vol.,  $\text{cm}^3 \text{cm}^{-3}$ ). RH is on average  $0.77 \pm 0.10$  during the entire SOAS campaign.

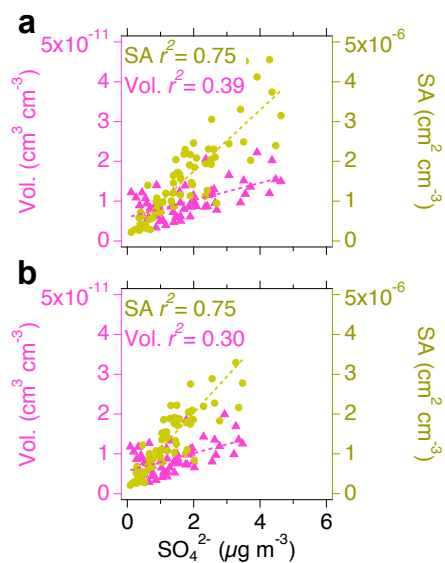

**Figure S5.** Correlation between aerosol surface area (SA) and liquid volume with sulfate mass concentration from ACSM measurements for (a) base case and (b) sulfate reduction scenarios. Reduction of sulfate does not impact correlation between sulfate, SA and volume.

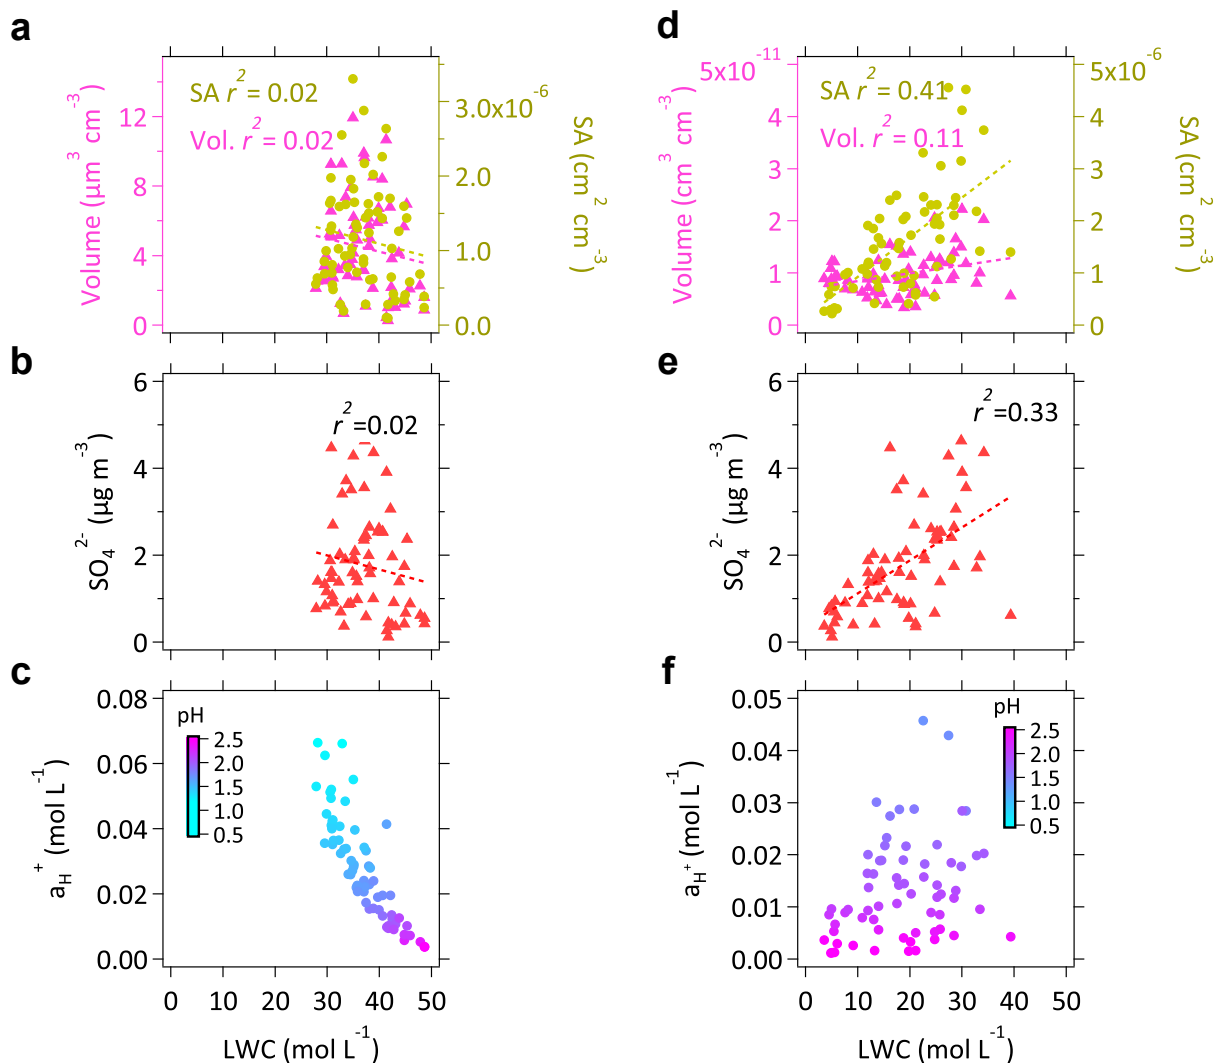

**Figure S6.** Dry aerosol surface area (SA) and volume measured by SEMS-MCPC (a), and sulfate aerosol measured by ACSM (b) show no relationship with estimated aerosol liquid water directly from ISORROPIA-II (excluding organic aerosol), whereas estimated proton activity ( $a_{H^+}$ ) has a negative relationship (c). Aerosol SA and volume determined by SEMS-MCPC, ISORROPIA-II, and observed organic aerosol information (d), sulfate aerosol measured by ACSM (e), and estimated  $a_{H^+}$  (f) show a relationship with estimated aerosol liquid water when water, organic aerosol, and inorganic aerosol are properly included.

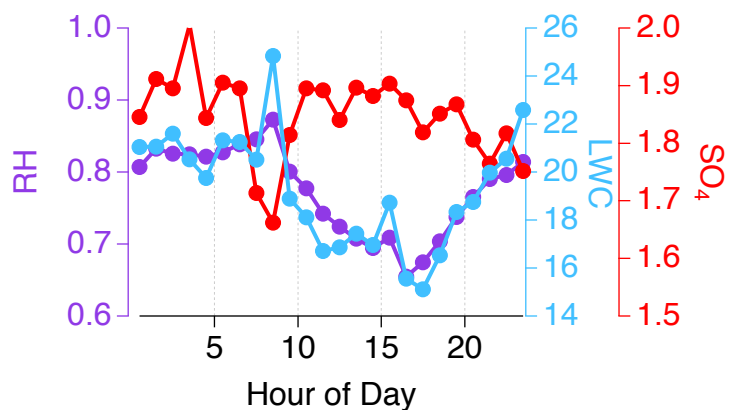

**Figure S7.** Diurnal trends of RH, LWC and sulfate at LRK site.

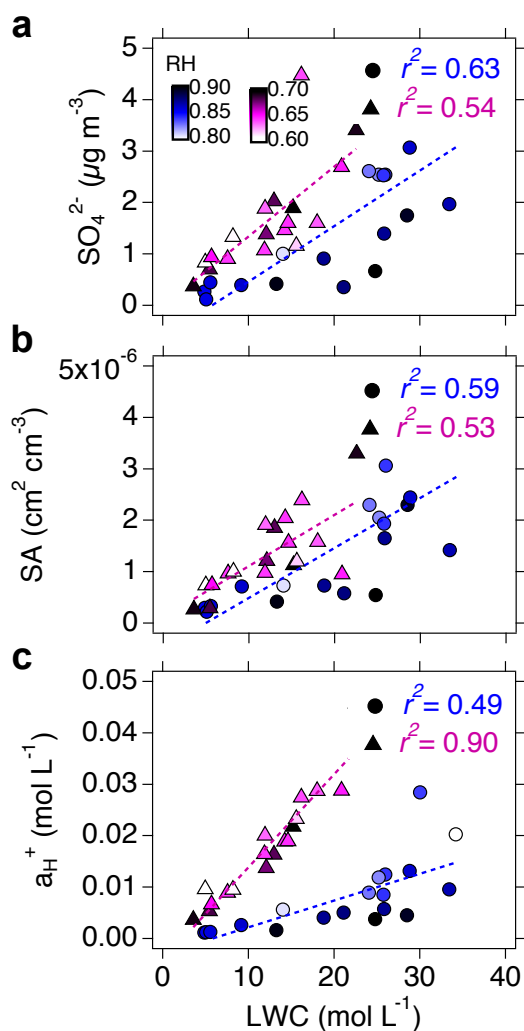

**Figure S8.** Scatterplots of (a) sulfate ( $\text{SO}_4^{2-}$ ), (b) aerosol surface area (SA), and (c) acidity ( $a_H^+$ ) versus LWC classified for RH ranges of 0.6 – 0.7 and 0.8 – 0.9.

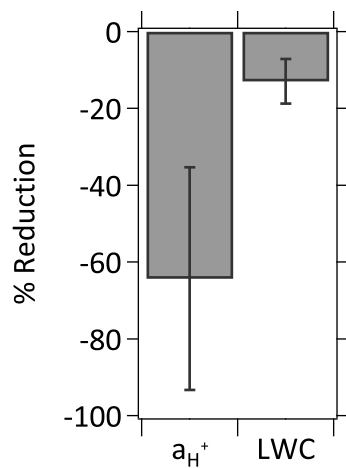

**Figure S9.** Effects of  $\text{SO}_4^{2-}$  reduction to proton activity ( $a_{H^+}$ ) and aerosol liquid water content (LWC) variables are presented as average percentage of changes. Vertical bar shows one standard deviation of the average change percentage. Large changes are found in  $a_{H^+}$  variable; however, the variability is large as well. On the other hand, LWC variable does not change significantly.
